# Supplementary material for: Metabolomics method to comprehensively analyze amino acids in different domains
Source: Royal Society of Chemistry journal article supplement (doi:10.1039/c4an02386b), 2015-01-01
Supplement: c4an02386b1.xlsx [file c4an02386b1.xlsx]

## Sheet: Myc Cell
	A1-1	A2-1	A3-1	CV, %			A4-1	A5-1	A6-1	CV, %							P1-1	P2-1	P3-1	CV, %			P4-1	P5-1	P6-1	CV, %
tyrosine	454891	401742	448021	6.6471			529734	551981	556216	2.60548						tyrosine	76154	76989	58134	15.1267			43666	54366	54102	12.0345
arginine	78688	61604	66891	12.6646			56380	64675	65635	8.17763						arginine	158295	171035	130744	13.4288			95143	116950	120970	12.5173
phenylalanine	1667752	1570138	1690516	3.89273			2058471	2149529	2250087	4.45243						phenylalanine	298429	280693	214664	16.6827			159508	214644	210133	15.7186
histidine	59705	50354	54601	8.53038			67154	71389	77147	6.97641						histidine	67745	67596	53328	13.1675			37196	45845	49387	14.2068
methionine	170509	153642	174577	6.67725			208176	213325	221151	3.04988						methionine	2574	3905	2483	26.6466			1332	1560	1876	17.1886
glutamic acid	3686489	3454482	3646396	3.44866			2715887	2745167	2792567	1.40648						glutamic acid	401806	401758	333211	10.4478			248119	300385	318855	12.6899
glutamine/lysine	1662364	1381946	1553004	9.22293			1656459	1676951	1760196	3.23587						glutamine/lysine	93834	111618	84231	14.3906			66626	78232	79201	9.36885
aspartic acid	61285	54435	61040	6.59548			48991	45767	50744	5.20502						aspartic acid	63670	68399	56166	9.83144			41443	47300	52462	11.7131
asparagine	2816	2468	2849	7.78643			1625	1672	1805	5.48969						leu/iso-leu	1099261	1059437	811893	15.7236			610067	809032	775491	14.5611
leu/iso-leu	6379637	5646121	6109653	6.13699			7050124	7330130	7623715	3.91051						threonine	94885	93651	78238	10.4307			57916	70084	72347	11.6219
threonine	244162	200054	224887	9.9143			293347	292555	314117	4.07545						valine	338661	330382	255807	14.8026			198104	248746	246590	12.3887
valine	1917370	1728054	1875117	5.40033			2191146	2295583	2390129	4.34206						proline	382467	381223	290691	14.9751			206160	270603	270566	14.9314
proline	1834291	1664798	1764653	4.85553			1462655	1507169	1535301	2.43919						serine	82616	84595	72532	8.09543			52985	64699	66912	12.163
serine	77327	63343	75512	10.5523			81786	82917	86332	2.82833						alanine	122756	121328	98306	12.0236			75011	92391	96555	12.9881
alanine	192113	155384	179530	10.6249			213264	210054	221225	2.67697						glycine	22442	23412	18503	12.1191			13202	17703	17596	15.8862
glycine	67720	59713	66942	6.8148			73941	74972	78387	3.07139										13.8595						13.3319
tryptophan	84636	84566	92262	5.07514			104564	109235	110101	2.75866						Protein Content (ug)	386.825	358.677	340.465				329.371	334.338	311.986
																Protein Content Normalization				Ave	CV, %					Ave	CV, %
																tyrosine	196.87	214.647	170.749	194.089	11.3766		132.574	162.608	173.412	156.198	13.5469
Protein Content (ug)	386.825	358.677	340.465				329.371	334.338	311.986							arginine	409.216	476.849	384.017	423.361	11.3391		288.863	349.795	387.742	342.133	14.58
Protein Content Normalization				Ave	CV, %					Ave	CV, %					phenylalanine	771.484	782.578	630.503	728.188	11.6425		484.28	641.996	673.533	599.937	16.9009
tyrosine	1175.96	1120.06	1315.91	1203.98	8.37925		1608.32	1650.97	1782.82	1680.7	5.4128					histidine	175.131	188.459	156.633	173.408	9.2169		112.93	137.122	158.299	136.117	16.6775
arginine	203.42	171.753	196.47	190.548	8.73453		171.175	193.442	210.378	191.665	10.2585					methionine	6.65418	10.8872	7.29298	8.27813	27.5667		4.04407	4.66593	6.01309	4.9077	20.5091
phenylalanine	4311.39	4377.58	4965.32	4551.43	7.90885		6249.7	6429.2	7212.14	6630.35	7.71871					glutamic acid	1038.73	1120.11	978.695	1045.84	6.7864		753.311	898.446	1022.02	891.258	15.0907
histidine	154.346	140.388	160.372	151.702	6.75739		203.885	213.523	247.277	221.562	10.284					glutamine/lysine	242.575	311.193	247.4	267.056	14.3415		202.282	233.991	253.861	230.045	11.3085
methionine	440.791	428.357	512.761	460.637	9.89227		632.041	638.051	708.849	659.647	6.47558					aspartic acid	164.597	190.698	164.969	173.421	8.6283		125.825	141.473	168.155	145.151	14.7456
glutamic acid	9530.13	9631.17	10710.1	9957.12	6.56838		8245.67	8210.75	8950.93	8469.12	4.93121					leu/iso-leu	2841.76	2953.73	2384.66	2726.72	11.0562		1852.22	2419.8	2485.66	2252.56	15.4609
glutamine/lysine	4297.46	3852.89	4561.43	4237.26	8.4508		5029.16	5015.73	5641.9	5228.93	6.84097					threonine	245.292	261.101	229.798	245.397	6.37816		175.838	209.62	231.892	205.783	13.715
aspartic acid	158.431	151.766	179.284	163.16	8.79869		148.741	136.888	162.648	149.426	8.62879					valine	875.49	921.112	751.347	849.316	10.3444		601.461	743.995	790.388	711.948	13.8291
asparagine	7.27978	6.88083	8.36798	7.50953	10.2501		4.93364	5.00092	5.78551	5.24003	9.03816					proline	988.735	1062.86	853.807	968.466	10.944		625.92	809.369	867.237	767.509	16.4151
leu/iso-leu	16492.3	15741.5	17945.1	16726.3	6.69755		21404.8	21924.3	24436.1	22588.4	7.17664					serine	213.575	235.853	213.038	220.822	5.89602		160.867	193.514	214.471	189.617	14.2464
threonine	631.196	557.755	660.53	616.493	8.58753		890.627	875.027	1006.83	924.161	7.79267					alanine	317.343	338.265	288.741	314.783	7.89786		227.74	276.34	309.485	271.188	15.1611
valine	4956.69	4817.85	5507.53	5094.02	7.16077		6652.51	6866.05	7661.01	7059.86	7.52777					glycine	58.0159	65.2731	54.3463	59.2118	9.39118		40.0824	52.9494	56.3999	49.8106	17.2647
proline	4741.92	4641.49	5183.07	4855.49	5.93353		4440.75	4507.92	4921.06	4623.24	5.62577
serine	199.902	176.602	221.791	199.432	11.3314		248.31	248.003	276.717	257.677	6.39966
alanine	496.641	433.214	527.309	485.721	9.87987		647.488	628.268	709.086	661.614	6.3814					Total Spectral Sum	8545.46	9133.61	7516				5788.24	7275.68	7798.56
glycine	175.066	166.481	196.62	179.389	8.65565		224.491	224.24	251.252	233.328	6.65292					Total Spectral Sum Normalization				Ave	CV, %					Ave	CV, %		Myc On Vs Off
tryptophan	218.797	235.772	270.989	241.852	11.0075		317.466	326.72	352.904	332.363	5.53027					tyrosine	0.0230379	0.0235008	0.0227181	0.0230856	1.70459		0.022904	0.0223495	0.0222364	0.0224966	1.58834		0.128048
																arginine	0.047887	0.0522082	0.0510932	0.0503961	4.45141		0.0499051	0.0480773	0.0497196	0.049234	2.04334		0.477384
Total Spectral Sum	48191.7	46651.5	53122.9				57120.1	58094.1	64537.7							phenylalanine	0.09028	0.0856811	0.0838882	0.0866164	3.80639		0.0836663	0.0882386	0.0863663	0.0860904	2.66999		0.83305
Total Spectral Sum Normalization				Ave	CV, %					Ave	CV, %		Myc On Vs Off			histidine	0.020494	0.0206336	0.02084	0.0206559	0.842517		0.0195103	0.0188466	0.0202984	0.0195518	3.71748		0.112105
tyrosine	0.0244017	0.0240092	0.0247711	0.024394	1.56189		0.0281568	0.0284188	0.0276245	0.0280667	1.44206		0.00033942			methionine	0.00077868	0.00119199	0.000970327	0.000980334	21.0988		0.000698671	0.000641305	0.000771051	0.000703675	9.23971		0.136579
arginine	0.00422106	0.00368162	0.0036984	0.00386703	7.93157		0.00299675	0.0033298	0.00325977	0.00319544	5.49524		0.0422213			glutamic acid	0.121553	0.122636	0.130215	0.124801	3.78153		0.130145	0.123486	0.131052	0.128228	3.22186		0.398504
phenylalanine	0.0894633	0.0938357	0.0934686	0.0922559	2.62902		0.109413	0.110669	0.111751	0.110611	1.05758		0.00157392			glutamine/lysine	0.0283864	0.0340712	0.0329165	0.0317914	9.45152		0.0349472	0.0321606	0.0325522	0.03322	4.54101		0.51593
histidine	0.00320276	0.00300929	0.00301889	0.00307698	3.54348		0.00356942	0.00367547	0.00383152	0.00369214	3.57083		0.00379546			aspartic acid	0.0192613	0.0208787	0.021949	0.0206963	6.53793		0.021738	0.0194447	0.0215623	0.020915	6.10253		0.848624
methionine	0.00914662	0.00918206	0.00965236	0.00932701	3.02688		0.0110651	0.0109831	0.0109835	0.0110106	0.429161		0.00788258			leu/iso-leu	0.332546	0.323391	0.317278	0.324405	2.36864		0.319997	0.332587	0.318733	0.323772	2.36588		0.924413
glutamic acid	0.197754	0.206449	0.201609	0.201938	2.15744		0.144357	0.141335	0.138693	0.141462	2.00333		0.000108936			threonine	0.0287044	0.0285868	0.0305745	0.0292886	3.80763		0.0303785	0.028811	0.0297352	0.0296416	2.65818		0.679909
glutamine/lysine	0.0891742	0.0825888	0.0858656	0.0858762	3.83425		0.0880453	0.0863381	0.0874203	0.0872679	0.989788		0.544445			valine	0.102451	0.100849	0.0999664	0.101089	1.24595		0.103911	0.102258	0.10135	0.102506	1.26651		0.246185
aspartic acid	0.00328751	0.00325318	0.0033749	0.0033052	1.89875		0.00260401	0.00235632	0.00252021	0.00249351	5.05238		0.00234249			proline	0.115703	0.116368	0.113599	0.115223	1.25458		0.108137	0.111243	0.111205	0.110195	1.61764		0.0207091
asparagine	0.000151059	0.000147494	0.000157521	0.000152025	3.34338		8.63732e-05	8.60832e-05	8.96455e-05	8.73673e-05	2.26438		0.000609928			serine	0.0249928	0.0258225	0.0283446	0.0263866	6.61584		0.0277921	0.0265973	0.0275014	0.0272969	2.28259		0.468614
leu/iso-leu	0.342223	0.337427	0.337803	0.339151	0.786366		0.374733	0.377393	0.378633	0.37692	0.528562		7.02076e-05			alanine	0.0371358	0.0370352	0.0384168	0.0375293	2.05249		0.0393453	0.0379813	0.0396849	0.0390038	2.31176		0.0992543
threonine	0.0130976	0.0119558	0.012434	0.0124958	4.58884		0.0155922	0.0150622	0.0156007	0.0154184	2.00048		0.00408726			glycine	0.0067891	0.00714647	0.00723075	0.00705544	3.32339		0.00692481	0.00727758	0.0072321	0.00714483	2.68576		0.637269
valine	0.102854	0.103273	0.103675	0.103267	0.39789		0.116465	0.118188	0.118706	0.117787	0.995964		0.000805837
proline	0.0983969	0.0994928	0.0975677	0.0984858	0.980497		0.0777441	0.0775968	0.0762509	0.0771973	1.06596		1.04551e-05
serine	0.00414805	0.00378555	0.00417506	0.00403622	5.38889		0.00434715	0.004269	0.00428769	0.00430128	0.948814		0.165294
alanine	0.0103055	0.00928617	0.00992621	0.0098393	5.23619		0.0113356	0.0108147	0.0109872	0.0110458	2.40231		0.0367825
glycine	0.00363271	0.00356861	0.00370122	0.00363418	1.82487		0.00393017	0.00385995	0.0038931	0.0038944	0.902034		0.00890032
tryptophan	0.00454013	0.00505389	0.00510117	0.0048984	6.35242		0.00555786	0.00562398	0.00546818	0.00555001	1.40897		0.0606422

## Sheet: Colon Cancer Serum
Sample 1:
Batch	Samples	Alanine Results	Arginine Results	Asparagine Results	Aspartic acid Results	Glutamic Acid Results	Glutamine Results	Glycine Results	Histidine Results	Isoleu-leu Results	Lysine Results	Methionine Results	Phenylenine Results	Proline Results	Serine Results	Threonine Results	Tryptophan Results	Tyrosine Results	Valine Results
Batch 1	S1-1.d	235332	50538	3563.37	4268.67	43768.5	144337	30875.2	5285.95	2.98743e+06	143695	42687.7	786223	683912	34753.5	63862.3	69185.5	94017.6	980320
	S1-3.d	161137	55106.2	3194.28	5706.08	47095.9	138756	30826.1	5153.04	3.58974e+06	138321	55216.9	1.12189e+06	669459	29256.3	41348.4	81818.4	116575	1.0391e+06
	S1-4.d	431207	71789.2	4191.22	3152.56	64455.6	192855	27217.5	6464.67	6.60191e+06	192793	89340.6	1.19146e+06	1.50704e+06	26309.1	45902.3	94432.3	189247	1.93551e+06
	S1-5.d	355086	68564.8	4593.83	4146.01	56830.9	177499	30562.1	9112.02	6.35544e+06	176819	96049.9	2.0622e+06	1.49434e+06	30563.3	79361.9	148415	204448	2.10411e+06
	S1-6.d	303357	35031.9	4135.36	3601.97	48706.9	145144	55837.5	4201.82	5.07232e+06	144522	59929.1	795500	1.17991e+06	34478.4	54403.7	53761.4	108497	1.02899e+06
	S1-7.d	277173	56471.7	4685.8	2710.14	60182.3	134031	23352.1	8244.7	6.69253e+06	129423	98083.5	1.36117e+06	982630	22572.4	93864.8	157599	244394	2.17184e+06
	S1-9.d	270684	74125.1	5021.16	5793.98	77657.4	117922	24130.3	5859.82	4.14853e+06	114732	61436.3	1.68847e+06	863496	38678.6	61953.6	101146	209293	1.52688e+06
	S1-10.d	344232	82353.1	3673.46	5391.08	46126.7	151632	20034	7987.74	5.84626e+06	151765	99188.4	1.37306e+06	1.2865e+06	35303.7	59514.9	130282	166542	1.88695e+06
	S1-11.d	190105	59640.5	3983.6	8845.03	90107.2	126609	28737.4	7380.48	4.57172e+06	126268	67258.4	2.2319e+06	1.2298e+06	35918.2	42927.6	81725.8	249100	1.30507e+06
	S1-12.d	281150	56803	3749.84	5731.46	56358.2	142087	17963.9	8184.78	6.79887e+06	142050	73474.7	1.9255e+06	717335	25953	38330.3	117204	129525	2.1435e+06
Batch 2	S1-13-2.d	315814	80466.7	4699.22	5458.99	56239.1	168709	28313.5	6482.35	7.26466e+06	168797	94992.5	1.74612e+06	1.15292e+06	45921.6	76405.4	127415	203484	1.83824e+06
	S1-14-2.d	284656	84544.7	4253.73	5484.4	50265.4	161607	52540	5103.85	6.2235e+06	160873	85206.2	1.77804e+06	1.64993e+06	47453.1	56972	139423	152205	2.0577e+06
	S1-15.d	392430	55260.5	6374.56	6012.21	98701.2	158165	20232	7918.09	3.44006e+06	157827	139675	2.11902e+06	1.41781e+06	40417.8	59737	150011	247061	943158
	S1-17.d	467567	96571	5524.93	10588	152017	217924	34758.9	5703.55	7.53796e+06	218042	90522.7	1.78496e+06	2.01177e+06	40767.3	75359.8	93092.1	183852	2.29145e+06
	S1-18.d	358720	105753	4855.25	6281.5	81063.6	170359	19989.7	5980.96	7.32627e+06	169593	88431.8	1.69626e+06	2.32097e+06	29066.5	48589.5	145923	169137	2.32857e+06
	S1-19.d	365789	91104.5	6004.26	7260.36	61401.8	199426	37012.8	5573.14	5.10789e+06	199576	99022.6	1.28223e+06	1.10737e+06	53916	98006.5	137735	132470	1.32235e+06
	S1-20.d	402957	53565	6381.88	6369.46	66774.2	202389	24905.7	7398.5	4.25334e+06	201693	68117	1.12759e+06	1.24282e+06	37034.1	61161.9	88080.3	125900	1.4136e+06
	S1-22.d	364060	71686.4	4588.46	4397.19	48822.5	173763	25192.3	8202.17	7.92592e+06	173759	127555	1.77835e+06	1.26822e+06	28178.1	93015.3	217623	243013	2.42862e+06
	S1-23.d	406795	57822.8	5704.15	7255.96	56882.1	172344	31541.8	8130.67	7.66862e+06	172115	144405	2.08189e+06	1.217e+06	64022.9	78277.8	203729	290590	1.9913e+06
Batch 3	S1-24.d	558373	53747.3	7819.53	7384.92	87477.9	189837	48590.3	7193.16	5.46592e+06	189059	89138	1.30839e+06	1.90381e+06	40278.6	70339.3	100375	167051	1.79426e+06
	S1-25.d	257402	60447.4	4181.78	5586.62	43799.3	106813	18153.7	6460.57	6.25885e+06	106507	76084.1	1.80134e+06	966772	25576.6	58272.7	129834	237602	2.09965e+06
	S1-26.d	300911	52484.6	4717.03	3749.53	64273.8	164691	19419.1	8636.71	6.7585e+06	164782	98992	1.54038e+06	1.05633e+06	27468.5	68778.8	196166	191295	2.30788e+06
	S1-27.d	466662	58033	4159.9	3616.07	56692.1	160673	21999.3	6628.2	4.9812e+06	160343	105854	1.71582e+06	1.68371e+06	28661.8	51163.9	118753	311449	1.66166e+06
	S1-28.d	274297	51124.7	8800.1	4368.46	55598.3	143217	30998.4	7953.33	5.04789e+06	142925	71656.7	1.32183e+06	1.47243e+06	39818.3	54456.4	154761	193686	1.90974e+06
	S1-29.d	321170	75078.2	5208.82	6978.99	70301.9	145629	29995.9	7178.86	5.89666e+06	145451	118402	2.1252e+06	1.16124e+06	37432.4	79243.9	165033	285386	1.87636e+06
	S1-31.d	360704	51091.1	4302.44	2226.55	43777.8	166105	15885.2	6980.67	5.86526e+06	165516	98510.7	1.33777e+06	1.12006e+06	27852.2	42650.2	111035	174194	2.05987e+06
	S1-32.d	276273	58321.5	6168.73	4806.83	52310	204678	28786	8208.4	4.95553e+06	203979	107308	1.37992e+06	1.04535e+06	38399.8	75760.1	130814	217188	1.61159e+06
	S1-33.d	176005	59744.2	3936.95	4788.47	33149	133929	17506.8	4910.29	5.9953e+06	133540	75592.7	1.73263e+06	743323	33399.5	37237.1	95667.7	125890	1.71919e+06
Batch 1	S1-35.d	234277	38256.4	6635.45	3619.23	18994.6	140152	16506.5	7257.08	3.92982e+06	139445	66223.9	776804	594402	28376.6	97748.3	85483.5	89416.2	1.34079e+06
	S1-36.d	141842	44942.9	3829.89	6587.86	104195	97937.3	17544.5	6927.03	2.94924e+06	97605.5	53994.8	1.3541e+06	626710	30706.9	37437.4	53048.4	125281	1.23547e+06
	S1-37.d	278126	62049.6	4970.9	4475.57	30769.8	147000	25123.9	8966.61	5.49842e+06	147000	88805	1.38374e+06	552658	32976.8	65495.2	123814	180570	1.67865e+06
	S1-38.d	263889	48251.4	4249.44	3651.19	35705.6	155451	26769.3	4364.49	4.96203e+06	154747	71706	1.20119e+06	754831	32680	63742.4	116072	146860	1.51118e+06
	S1-39.d	261338	52258.6	4348.08	4368.32	54578.9	129060	20883.3	7286.59	6.10316e+06	128869	79167.6	1.65463e+06	936360	34143.1	50001.5	132585	179960	2.00567e+06
	S1-41.d	258848	59989.3	3959.25	3755.73	48098	135754	14654.3	8551.01	5.52994e+06	135395	72261.5	1.35694e+06	578462	31645.8	53743.1	109771	142412	1.76631e+06
	S1-42.d	217968	66177.8	4828.58	2651.28	31716.2	138463	17466.9	8774.37	8.98537e+06	138122	85514.5	1.40495e+06	815724	25953.1	54059.8	148870	187912	2.51212e+06
	S1-43.d	355447	41757	4436.63	4081.72	39133.7	150933	21468.6	10143.1	5.43361e+06	151137	95782.4	1.5826e+06	623354	27547.3	53034.5	140572	206785	1.89913e+06
	S1-44.d	176170	63763.9	3013.83	1772.48	19514	92120.3	12968.6	8726.87	8.50349e+06	91427.1	99716.1	2.05994e+06	422659	15578.5	27589.8	196306	258629	2.60627e+06
Batch 2	S1-49.d	488260	72344	6856.49	6549.7	75113.3	242486	34063.9	10218.9	8.46044e+06	242377	161419	1.9805e+06	2.07526e+06	42803.3	97632.8	180580	268537	2.66623e+06
	S1-50.d	308455	78442.5	8128.91	4733.96	46326.6	261957	45025.5	8186.97	4.85863e+06	261067	85407.2	1.08966e+06	1.73321e+06	57638.2	82420.5	92878.7	175293	1.32388e+06
	S1-51.d	420698	64839.1	6645.4	7126.29	66241.8	221203	26023.9	9555.68	8.27769e+06	221162	127912	1.766e+06	1.54581e+06	43735.5	75407.9	176861	255755	2.71829e+06
	S1-52.d	444547	78530.4	6743.67	4485.3	43516.9	210359	28659.8	9675.25	6.94413e+06	210557	131217	1.54573e+06	1.56968e+06	41537.6	111066	158190	223319	2.01406e+06
	S1-53.d	505319	50435.6	6516.02	3630	49532.2	217785	22204.5	10288.6	6.81665e+06	216624	151961	2.03456e+06	1.26287e+06	39588.7	103703	194272	293007	2.38407e+06
	S1-54.d	328814	44217.9	5090.33	4069.48	32257.6	164577	38767.9	5316.57	5.30784e+06	163943	113382	1.09062e+06	2.28666e+06	42967	62019.9	99587.2	118122	1.18499e+06
	S1-55.d	276467	57089	5277.77	4121.61	66858	196390	21010.1	9961.34	6.97115e+06	196024	100513	1.44971e+06	1.71171e+06	40021.9	82838.4	168870	175508	2.08419e+06
Batch 3	S1-56.d	291485	57158.5	5649.94	5172.82	43970.1	195949	33242.6	8533.8	5.88044e+06	195443	88692.1	1.24449e+06	715193	53086.3	67366.8	131635	143774	1.9842e+06
	S1-57.d	362748	55649.5	5565.34	3800.14	59683.8	176530	25276.2	7554.35	6.06454e+06	176157	117708	1.66774e+06	1.30743e+06	37156.8	67482.9	194897	247098	2.11984e+06
	S1-58.d	463009	63753.4	5173.67	3419.68	43084	197298	19083.5	7827.94	7.20692e+06	196629	123231	1.62265e+06	1.19284e+06	27950.8	57451.2	164684	190661	2.2597e+06
	S1-59.d	374214	57362.6	5134.08	2639.81	41170.8	232252	38954.8	9680.18	6.51198e+06	231133	100910	1.39173e+06	1.43715e+06	36568.8	73598.5	126240	174222	2.10652e+06
	S1-60.d	386184	52778.8	4181.6	4508.84	47683.5	167475	22425.8	6082.46	4.42568e+06	167629	97440.2	2.29158e+06	1.25285e+06	27310.8	58965.6	127126	211241	1.72211e+06
	S1-61.d	406053	71998.3	6327.58	2754.14	26661.6	201009	22774.1	10057.9	5.86644e+06	200792	119800	1.4682e+06	1.0134e+06	30009.5	84202.7	135011	180994	1.93513e+06
	S1-62.d	343645	46733.9	4734.7	2611.21	33519.1	181524	23757	9166.02	5.77138e+06	181380	94507.7	1.24336e+06	1.3618e+06	32855.6	47580	88681.2	155682	1.67245e+06
	S1-63.d	440241	38869.1	5658.53	3675.35	60473.9	175010	20003.6	9398.13	8.41023e+06	174020	139623	1.67347e+06	1.27143e+06	26518.7	91543	171734	236012	2.83274e+06
	S1-64.d	306431	65097.5	4028.98	2585.65	28515.3	155363	22727.9	6764.86	5.33335e+06	155009	99058.9	1.47968e+06	987313	23577	50552.8	123969	180880	1.73764e+06
	S1-65.d	273640	57291.2	4370.4	2963.41	60086.8	186357	25561.6	7813.93	5.90447e+06	185774	91729.4	1.12338e+06	1.08078e+06	35060.9	72088.3	103453	163259	1.997e+06
	S1-66.d	336573	47533.5	4707.61	2966.74	43716.2	200214	20638.3	10573.7	5.67517e+06	200389	92785.5	1.53729e+06	1.14334e+06	27256.5	68933.1	137172	195366	1.97141e+06
	S1-67.d	277997	55313.4	5469.07	3453.23	33251.9	164901	20392.2	8218.27	6.25782e+06	164084	110405	1.58719e+06	884174	37811.8	61784.7	174805	193275	2.07747e+06
Sample 2:
Batch	Samples	Alanine Results	Arginine Results	Asparagine Results	Aspartic acid Results	Glutamic Acid Results	Glutamine Results	Glycine Results	Histidine Results	Isoleu-leu Results	Lysine Results	Methionine Results	Phenylenine Results	Proline Results	Serine Results	Threonine Results	Tryptophan Results	Tyrosine Results	Valine Results
Batch 1	S2-1.d	371939	83543.3		78362.8	708813		64007	11998.7	5.33734e+06	73966.4	52436.5	1.80571e+06	1.46253e+06	105314	157987		193651	2.65238e+06
	S2-3.d	241860	73070.1		66723.3	656061		67897	8962.16	4.22718e+06	37802.1	35247.6	1.53711e+06	1.1377e+06	74973.6	111624		157984	2.15824e+06
	S2-4.d	420496	47687.8		33840.2	636400		49127.5	8926.72	3.90584e+06	41865	38538.8	1.05281e+06	1.58113e+06	61185.5	82535.1		146281	2.18619e+06
	S2-5.d	380735	50343.5		38085.8	547417		57596.1	11426.5	4.00257e+06	42383.7	40344.5	1.41373e+06	1.61314e+06	65547.6	109720		132061	2.30172e+06
	S2-6.d	338328	37384.3		47482.9	518872		93551.4	6620.28	3.65835e+06	28599.4	34460.3	1.14618e+06	1.30995e+06	75146.1	97421.1		120954	1.75196e+06
	S2-7.d	295091	40532.3		34678.6	514237		46513.4	10114.1	4.08274e+06	51972.1	42551.9	1.13991e+06	1.26249e+06	57347.4	133062		163520	2.44197e+06
	S2-9.d	356368	89903.3		84554.1	630692		59043.9	9768.64	5.00025e+06	54327.2	41050.5	1.80454e+06	1.41792e+06	90962.5	164427		231413	2.36218e+06
	S2-10.d	403971	70839.7		53935.9	623453		50592.6	11256.2	4.50436e+06	46846.2	40656.1	1.49896e+06	1.6666e+06	84199.1	119014		156815	2.5812e+06
	S2-11.d	253599	54230		61186.5	516889		56487.7	10140.2	3.5029e+06	35394.5	39463.3	1.41699e+06	1.57731e+06	86547.5	97545.3		167377	1.9341e+06
	S2-12.d	315135	38552.3		46242.3	530027		41534.9	8906.56	5.20029e+06	60932	69352	1.67338e+06	1.09684e+06	90947.5	106962		192467	2.50342e+06
Batch 2	S2-13-2.d	375542	68553.1		56885.6	772332		59069.3	8646.72	5.80157e+06	65654.6	56175.6	1.84339e+06	1.61033e+06	98204.1	152582		211505	2.92789e+06
	S2-14-2.d	320027	63427.5		49585.1	635872		87686.8	7944.19	4.4094e+06	54916.3	43137.9	1.56606e+06	1.79989e+06	91215.8	107824		138728	2.8115e+06
	S2-15.d	386235	47504.2		61032.6	656460		54479.3	10314.3	3.20606e+06	39289.6	43724.1	1.63647e+06	1.37486e+06	77648.7	94215.2		151796	1.96653e+06
	S2-17.d	429134	72960		69775.8	766955		65045.3	10589	5.05657e+06	48968	41936.8	1.5282e+06	1.82102e+06	88110.8	127359		158126	2.87007e+06
	S2-18.d	396145	73347.5		63931.2	743793		57681.6	9541.41	5.34953e+06	57267.9	39467.8	1.74853e+06	2.17377e+06	84017.9	117137		156921	3.11218e+06
	S2-19.d	256187	76906.2		41588.6	383117		49973.9	9332.5	4.11051e+06	57156.4	37013.4	1.32985e+06	291689	78365	92213.9		200832	4.05665e+06
	S2-20.d	499928	72399.5		78197	883461		57057.1	11593.3	7.41404e+06	84927.9	72830.9	2.19755e+06	2.02446e+06	117852	181778		283729	3.45085e+06
	S2-22.d	422002	66500.4		58596.7	771350		57553.2	11707.8	6.03273e+06	66760.4	48304.3	1.76101e+06	1.76415e+06	84642.4	162568		204196	3.12202e+06
	S2-23.d	476455	74329.9		85440.8	730935		72922	14372.1	6.00965e+06	63762.7	59508.7	2.02766e+06	1.64882e+06	123758	155908		204004	3.01215e+06
Batch 3	S2-24.d	559698	56927.3		67822.7	717008		79990.7	10737.4	5.06486e+06	55292	53382.3	1.52141e+06	2.06543e+06	98263.1	141291		189857	2.77871e+06
	S2-25.d	369724	78436		77830.3	606973		58431.9	12807.3	5.99276e+06	64658.7	50361.9	2.05991e+06	1.60652e+06	100611	146774		207645	3.24603e+06
	S2-26.d	349206	41326.7		48865.4	723075		48516.1	9502.99	5.44457e+06	66692.7	45967.2	1.69934e+06	1.55769e+06	87963.1	153157		190061	3.04449e+06
	S2-27.d	545693	76825.4		77887.5	764383		63393	11343.2	5.81564e+06	61244.8	57721.8	2.08075e+06	2.18049e+06	102552	141301		233221	2.89571e+06
	S2-28.d	340141	56996.6		70963.1	631423		65922.4	10438.2	5.31082e+06	59672.8	46090.7	1.77286e+06	1.80241e+06	106307	135348		209698	2.90145e+06
	S2-29.d	406400	79566.7		79751.1	688719		65856.9	12889	5.79165e+06	65454.7	62554.7	2.11071e+06	1.71719e+06	103065	155692		229892	3.01646e+06
	S2-31.d	420588	47907		55906.1	684075		51413.4	8879.43	5.30015e+06	61416.5	56149.1	1.65039e+06	1.59279e+06	96173.6	133362		209229	2.8608e+06
	S2-32.d	339000	52761.4		58205.9	753357		66029.9	9971.15	4.36842e+06	55869.8	42769.4	1.54257e+06	1.37003e+06	90864.7	137430		175893	2.50272e+06
	S2-33.d	245441	60814.1		66924.7	585363		68162.8	8539.02	4.3618e+06	35480.1	36698.9	1.74173e+06	1.00887e+06	99700.8	82375.4		112636	2.48775e+06
Batch 1	S2-35.d	321507	52224.1		54085	550070		43902.5	11243	4.79979e+06	65379.3	51293.3	1.38333e+06	1.13953e+06	86503.3	168046		178251	2.46366e+06
	S2-36.d	203173	51036.2		53241.7	489991		43893.2	10908.7	3.00334e+06	33295.3	32754.6	1.17264e+06	1.01075e+06	80035.2	88785.3		119933	1.9307e+06
	S2-37.d	372216	67437.1		47783.4	553567		53827.3	12504.9	4.52064e+06	52343.3	50899.5	1.40032e+06	1.08377e+06	83173	126087		176087	2.55003e+06
	S2-38.d	337575	45904.7		44205.1	622293		52499.8	6275.97	4.65113e+06	60367.9	49024.6	1.39914e+06	1.26458e+06	85500.2	137921		171831	2.526e+06
	S2-39.d	327221	49586.4		47404.1	529387		56632.9	8889.96	4.42842e+06	46153.2	36455.5	1.50559e+06	1.33084e+06	79619.1	99440.9		150133	2.5577e+06
	S2-41.d	355135	75043.1		53168.6	659881		43977.9	11642.1	5.84972e+06	59683.1	57176.6	1.66969e+06	1.40608e+06	109571	151430		236449	2.93795e+06
	S2-42.d	305576	53463		41292	592420		46136.7	10127.3	6.09399e+06	59635.8	52642.1	1.56051e+06	1.40321e+06	83521.7	131516		198728	3.07156e+06
	S2-43.d	426837	53614.1		57117.5	654110		49842.6	13925.3	5.75703e+06	67654.5	63407.6	1.82729e+06	1.3469e+06	94409.3	144103		236197	2.91121e+06
	S2-44.d	431163	108076		72610.3	789878		49139.9	16918	1.15699e+07	98211.7	83006.8	3.40079e+06	1.49276e+06	98180.8	189072		413673	4.42414e+06
Batch 2	S2-49.d	455250	54263		52162	760512		66321.7	10757.8	5.24052e+06	50395.3	54152.7	1.60226e+06	1.83246e+06	81374.6	134172		178045	3.21892e+06
	S2-50.d	345486	58966.9		57785.2	794059		70300.1	9193.49	4.80371e+06	61390.6	40227.5	1.53805e+06	1.41641e+06	111231	151069		205003	3.08586e+06
	S2-51.d	436405	50412.8		56462.2	824296		62264.9	9122.83	6.05858e+06	65719	49078.1	1.79062e+06	1.71693e+06	101721	143686		215840	3.4974e+06
	S2-52.d	379516	70555.1		52279.5	520435		54517.2	10809.1	5.16642e+06	72784.3	40156.5	1.7422e+06	506381	90507	135940		203379	4.18722e+06
	S2-53.d	514114	49257.5		57747.2	740011		53826.2	13086.8	5.33968e+06	59404.8	54564.4	1.86466e+06	1.57013e+06	92601.4	158147		203680	2.85979e+06
	S2-54.d	419081	58174.6		67881.6	689834		71939.4	9300.6	5.62655e+06	50101.5	61148.8	1.84881e+06	2.34622e+06	99947.8	136278		178283	2.58332e+06
	S2-55.d	370179	74366.3		70722.3	780329		53735	13840.7	6.12498e+06	63805.8	60665.2	1.81322e+06	1.97935e+06	109526	163627		211328	3.17559e+06
Batch 3	S2-56.d	372465	55530.8		60792.3	756653		63507.7	12303.2	5.38157e+06	67692.8	46549.5	1.54145e+06	1.36339e+06	114380	152834		192313	3.03334e+06
	S2-57.d	440591	61054.4		64234.2	783808		63078.9	9417.85	5.66982e+06	74652.4	55195.8	1.85736e+06	1.76049e+06	113819	156151		220339	3.27089e+06
	S2-58.d	459034	47747.9		48137.1	749618		48605.3	7921.43	5.05402e+06	64186.7	39143.5	1.60676e+06	1.44657e+06	82986.8	125914		160698	2.82221e+06
	S2-59.d	414159	55523.2		57571.8	822951		70765.2	12761.9	5.78431e+06	74292.1	47467.9	1.74828e+06	1.81894e+06	110178	163490		189439	3.0881e+06
	S2-60.d	435463	42642.1		59527.9	768739		60141.1	7238.81	5.08789e+06	66402	53729.9	2.21906e+06	1.69685e+06	94532.3	138650		233714	2.81865e+06
	S2-61.d	417664	50004.4		49316.9	724326		49947.2	10322.8	5.56225e+06	71753.7	50680.4	1.78299e+06	1.44504e+06	91056.5	162873		212073	2.82036e+06
	S2-62.d	371996	44821.4		49159.7	641844		51753.3	10758.7	4.14074e+06	47848.5	36250.4	1.25438e+06	1.57406e+06	79855.6	102350		146982	2.47033e+06
	S2-63.d	458259	43957.9		55253.5	713390		49504.5	11682.9	6.69134e+06	78702.4	51906.1	1.85368e+06	1.69212e+06	88636.5	167356		214893	3.40515e+06
	S2-64.d	311952	49661.3		40757.1	546405		50958.5	8432.11	3.84882e+06	43613.3	37672.9	1.41277e+06	1.17145e+06	62219.9	87315.9		136254	2.31767e+06
	S2-65.d	385118	74254.1		68964.1	797785		60267.9	11581.5	6.40419e+06	73188.8	58853	1.89982e+06	1.71338e+06	105993	171992		225560	3.04093e+06
	S2-66.d	485512	81716.3		92223.7	828822		58250.8	17336.1	7.2597e+06	92270	68225.5	2.26572e+06	2.03157e+06	123828	196980		276205	3.2516e+06
	S2-67.d	382808	53113.9		70114.6	730535		57851.4	9509.42	5.79159e+06	78216.5	58133.1	2.00139e+06	1.55578e+06	117753	163384		225393	2.98573e+06
Sample 3:
Batch	Samples	Alanine Results	Arginine Results	Asparagine Results	Aspartic acid Results	Glutamic Acid Results	Glutamine Results	Glycine Results	Histidine Results	Isoleu-leu Results	Lysine Results	Methionine Results	Phenylenine Results	Proline Results	Serine Results	Threonine Results	Tryptophan Results	Tyrosine Results	Valine Results
Batch 1-3	S3-1.d	3.2537e+06	1.75441e+06		913614	4.0049e+06		348829	349199	1.7474e+07	1.11749e+06	152674	4.52261e+06	8.61808e+06	1.21411e+06	1.56042e+06		575580	6.64245e+06
	S3-3.d	3.38071e+06	2.00231e+06		1.00193e+06	4.27388e+06		434917	390481	2.06214e+07	1.26769e+06	184088	5.67755e+06	1.03755e+07	1.5683e+06	1.88326e+06		801026	8.17346e+06
	S3-4.d	3.44652e+06	2.01571e+06		992937	4.33251e+06		400077	385983	2.10105e+07	1.28733e+06	165735	5.9743e+06	1.01395e+07	1.46287e+06	1.80965e+06		840914	8.08283e+06
	S3-5.d	3.89699e+06	2.34009e+06		1.08452e+06	4.83511e+06		421561	441416	2.37075e+07	1.51526e+06	162620	7.25565e+06	1.08345e+07	1.61095e+06	1.96085e+06		969456	7.86946e+06
	S3-6.d	3.02208e+06	1.65306e+06		883419	3.79947e+06		353969	336820	1.71261e+07	1.06151e+06	148556	4.82535e+06	8.11809e+06	1.24056e+06	1.55145e+06		671644	7.00466e+06
	S3-7.d	3.52895e+06	2.01057e+06		997148	4.37471e+06		379087	394044	2.04989e+07	1.32067e+06	189987	5.98933e+06	9.45085e+06	1.34851e+06	1.67635e+06		820678	7.78197e+06
	S3-9.d	3.81184e+06	2.26048e+06		1.10084e+06	4.77861e+06		441975	440864	2.37189e+07	1.48657e+06	182921	6.81182e+06	1.11188e+07	1.61378e+06	1.95185e+06		968999	9.12538e+06
	S3-10.d	3.40548e+06	1.96848e+06		1.02024e+06	4.34533e+06		417964	401300	2.18859e+07	1.33059e+06	160609	6.21923e+06	9.81095e+06	1.50657e+06	1.77963e+06		857886	7.0845e+06
	S3-11.d	3.00347e+06	1.6714e+06		945491	3.89382e+06		405700	352712	1.92814e+07	1.08509e+06	140817	5.20567e+06	8.9092e+06	1.33027e+06	1.66457e+06		756896	7.6463e+06
	S3-12.d	3.84254e+06	2.07241e+06		1.0493e+06	4.75508e+06		371118	405678	2.20482e+07	1.42333e+06	200360	6.75393e+06	9.84754e+06	1.3775e+06	1.75033e+06		969018	8.07828e+06
Batch 2	S3-13-2.d	4.3415e+06	2.3503e+06		1.21414e+06	5.38477e+06		497041	466527	2.58361e+07	1.55255e+06	199568	7.51384e+06	1.27434e+07	1.75128e+06	2.20231e+06		1.04333e+06	9.47329e+06
	S3-14-2.d	4.38029e+06	2.25713e+06		1.16327e+06	5.12453e+06		429528	471739	2.30056e+07	1.49942e+06	205269	6.28946e+06	1.13634e+07	1.52989e+06	1.90959e+06		777597	8.70373e+06
	S3-15.d	3.92788e+06	1.91402e+06		1.08174e+06	4.6651e+06		423629	405940	2.02273e+07	1.23531e+06	200718	5.18171e+06	1.06639e+07	1.45806e+06	1.86067e+06		656858	7.704e+06
	S3-17.d	4.17396e+06	2.31469e+06		1.21142e+06	5.26802e+06		509101	461774	2.50722e+07	1.50157e+06	170530	6.80193e+06	1.25471e+07	1.75283e+06	2.16092e+06		941608	8.98753e+06
	S3-18.d	4.08103e+06	2.17194e+06		1.15533e+06	4.98953e+06		455631	451063	2.32136e+07	1.44765e+06	129664	6.40445e+06	1.11593e+07	1.47069e+06	1.96211e+06		734328	5.50239e+06
	S3-19.d	4.24407e+06	2.21304e+06		1.18583e+06	5.21115e+06		464054	451520	2.41718e+07	1.46363e+06	187668	6.77252e+06	1.20411e+07	1.66139e+06	2.06989e+06		911519	8.74678e+06
	S3-20.d	4.37512e+06	2.25676e+06		1.1829e+06	5.17159e+06		430443	465557	2.37512e+07	1.53133e+06	178176	6.73011e+06	1.11277e+07	1.48307e+06	1.95718e+06		870451	6.6856e+06
	S3-22.d	4.54821e+06	2.31206e+06		1.23997e+06	5.43577e+06		461266	483514	2.6098e+07	1.59073e+06	175207	7.74344e+06	1.21892e+07	1.69956e+06	2.08294e+06		1.07606e+06	8.13447e+06
	S3-23.d	4.18694e+06	2.22774e+06		1.2149e+06	5.11479e+06		516868	476079	2.60227e+07	1.49896e+06	178466	7.64533e+06	1.24465e+07	1.73187e+06	2.17483e+06		1.02634e+06	7.85758e+06
Batch 3	S3-24.d	4.19144e+06	2.33785e+06		1.15969e+06	5.00072e+06		503938	471434	2.39542e+07	1.55458e+06	220027	6.57887e+06	1.21079e+07	1.73183e+06	2.11087e+06		945316	9.02451e+06
	S3-25.d	3.95576e+06	2.14785e+06		1.14608e+06	5.11454e+06		495829	428719	2.41342e+07	1.41344e+06	111655	6.85696e+06	1.20401e+07	1.86494e+06	2.17869e+06		988907	9.0752e+06
	S3-26.d	4.17948e+06	2.19934e+06		1.14354e+06	4.99424e+06		410297	437649	2.36604e+07	1.47126e+06	236988	6.98545e+06	1.0949e+07	1.37972e+06	1.88628e+06		924476	8.15842e+06
	S3-27.d	3.89133e+06	2.06125e+06		1.11202e+06	4.76061e+06		462256	434282	2.27478e+07	1.3781e+06	196876	6.30797e+06	1.07276e+07	1.5282e+06	1.96627e+06		915271	8.30086e+06
	S3-28.d	4.03942e+06	2.18259e+06		1.1618e+06	5.0519e+06		464796	440074	2.42223e+07	1.49026e+06	263419	7.10733e+06	1.16877e+07	1.60291e+06	2.02659e+06		1.01016e+06	9.12885e+06
	S3-29.d	4.03928e+06	2.24717e+06		1.17092e+06	5.04922e+06		482238	449425	2.48337e+07	1.48906e+06	226098	7.24916e+06	1.17792e+07	1.68292e+06	2.07174e+06		1.0381e+06	9.44592e+06
	S3-31.d	4.0781e+06	2.08252e+06		1.12261e+06	4.8112e+06		407869	434338	2.29629e+07	1.44038e+06	232777	6.7311e+06	1.03777e+07	1.25754e+06	1.76563e+06		892998	7.74997e+06
	S3-32.d	4.01166e+06	2.1464e+06		1.1242e+06	4.91668e+06		456966	445004	2.38328e+07	1.4706e+06	205847	6.89688e+06	1.15039e+07	1.54194e+06	1.99976e+06		991785	9.18835e+06
	S3-33.d	3.85304e+06	2.03425e+06		1.14341e+06	4.69936e+06		475706	441124	2.35922e+07	1.39469e+06	235777	6.74317e+06	1.10117e+07	1.4702e+06	1.90413e+06		1.0152e+06	8.61496e+06
Batch 1	S3-35.d	3.50248e+06	1.9498e+06		967704	4.35888e+06		361572	374955	1.99766e+07	1.27006e+06	166536	5.72565e+06	9.40179e+06	1.36113e+06	1.70559e+06		769777	7.51028e+06
	S3-36.d	3.28985e+06	1.98689e+06		994148	4.34322e+06		451796	384917	2.14654e+07	1.24998e+06	136769	5.95575e+06	1.07307e+07	1.7076e+06	1.98082e+06		844011	9.03684e+06
	S3-37.d	3.62311e+06	2.17142e+06		1.02841e+06	4.56177e+06		393027	410849	2.22405e+07	1.41022e+06	153326	6.58707e+06	9.9396e+06	1.47269e+06	1.80363e+06		905283	6.59448e+06
	S3-38.d	3.74682e+06	2.12921e+06		1.02475e+06	4.58713e+06		374333	408502	2.16305e+07	1.39388e+06	166755	6.57481e+06	9.80262e+06	1.42753e+06	1.76855e+06		899079	7.52364e+06
	S3-39.d	3.54571e+06	2.014e+06		1.00782e+06	4.46252e+06		390545	399069	2.18601e+07	1.31746e+06	176119	6.45152e+06	9.71841e+06	1.41762e+06	1.79401e+06		896601	7.29135e+06
	S3-41.d	3.79168e+06	2.08422e+06		1.05506e+06	4.61075e+06		372932	406028	2.19968e+07	1.38185e+06	163986	6.53328e+06	9.79829e+06	1.36364e+06	1.73169e+06		874496	7.83332e+06
	S3-42.d	3.67404e+06	2.0374e+06		1.018e+06	4.51129e+06		373182	399909	2.15457e+07	1.35326e+06	147460	6.53426e+06	9.65146e+06	1.38921e+06	1.70223e+06		861442	6.58379e+06
	S3-43.d	3.82207e+06	2.1384e+06		1.04376e+06	4.7272e+06		432751	413636	2.26515e+07	1.39352e+06	82354.6	6.83168e+06	1.05737e+07	1.67536e+06	1.93292e+06		955860	7.78809e+06
	S3-44.d	4.87756e+06	2.94377e+06		1.27933e+06	5.89096e+06		472319	556257	3.08439e+07	1.9887e+06	223401	9.89235e+06	1.30329e+07	1.74986e+06	2.17667e+06		1.31444e+06	1.08841e+07
Batch 2	S3-49.d	4.16576e+06	2.23955e+06		1.17585e+06	5.14658e+06		487064	451646	2.43207e+07	1.46657e+06	180114	6.6801e+06	1.21724e+07	1.66832e+06	2.09943e+06		946925	8.09623e+06
	S3-50.d	3.57842e+06	1.7438e+06		976435	4.37954e+06		383825	366903	1.91823e+07	1.18343e+06	133154	5.23156e+06	9.66181e+06	1.3922e+06	1.76363e+06		713614	7.06393e+06
	S3-51.d	4.24115e+06	2.24128e+06		1.18285e+06	5.15382e+06		450779	455334	2.36558e+07	1.50249e+06	178922	6.65822e+06	1.15274e+07	1.58495e+06	2.02989e+06		896316	7.76242e+06
	S3-52.d	4.0827e+06	2.0715e+06		1.15868e+06	4.95652e+06		460823	433672	2.30448e+07	1.37742e+06	171801	6.38197e+06	1.11252e+07	1.53987e+06	1.974e+06		892995	7.63272e+06
	S3-53.d	3.98306e+06	1.93897e+06		1.10247e+06	4.77294e+06		420335	405201	2.17065e+07	1.31706e+06	174117	6.16872e+06	1.05125e+07	1.52683e+06	1.90522e+06		870313	7.6406e+06
	S3-54.d	4.58747e+06	2.3045e+06		1.28321e+06	5.39584e+06		506247	504780	2.64834e+07	1.66172e+06	196974	7.70386e+06	1.21934e+07	1.69361e+06	2.15047e+06		1.06329e+06	8.29884e+06
	S3-55.d	4.47733e+06	2.36668e+06		1.23834e+06	5.504e+06		491447	481694	2.69829e+07	1.67406e+06	171474	8.04084e+06	1.31489e+07	1.90759e+06	2.26929e+06		1.18988e+06	8.65682e+06
Batch 3	S3-56.d	4.9461e+06	2.67082e+06		1.30669e+06	5.78448e+06		495101	541666	2.84547e+07	1.83206e+06	265924	8.35431e+06	1.34334e+07	1.65582e+06	2.24217e+06		1.07887e+06	9.6818e+06
	S3-57.d	4.3403e+06	2.20176e+06		1.15657e+06	5.11418e+06		420227	450234	2.43615e+07	1.53908e+06	228366	7.35992e+06	1.13004e+07	1.39717e+06	1.94002e+06		977196	8.22487e+06
	S3-58.d	4.37132e+06	2.31805e+06		1.18212e+06	5.27725e+06		447790	472569	2.45095e+07	1.59811e+06	205217	7.21931e+06	1.14605e+07	1.52094e+06	2.01551e+06		1.01375e+06	9.03111e+06
	S3-59.d	4.43479e+06	2.52084e+06		1.24436e+06	5.39555e+06		498792	502799	2.63091e+07	1.68256e+06	239288	7.94262e+06	1.25818e+07	1.68754e+06	2.12675e+06		1.0832e+06	9.78619e+06
	S3-60.d	4.50536e+06	2.46355e+06		1.25995e+06	5.59993e+06		480582	500012	2.67978e+07	1.65718e+06	164183	7.911e+06	1.25126e+07	1.68416e+06	2.12605e+06		1.1127e+06	1.00807e+07
	S3-61.d	4.31364e+06	2.29533e+06		1.17923e+06	5.27188e+06		447560	459319	2.54025e+07	1.53474e+06	236012	7.51813e+06	1.1867e+07	1.57208e+06	2.01852e+06		1.07738e+06	9.41613e+06
	S3-62.d	4.13982e+06	2.16379e+06		1.12831e+06	4.90421e+06		432584	447594	2.32641e+07	1.4656e+06	196775	6.83545e+06	1.13298e+07	1.46638e+06	1.96652e+06		910851	8.03412e+06
	S3-63.d	4.60397e+06	2.6006e+06		1.24909e+06	5.41274e+06		485692	513703	2.64066e+07	1.74294e+06	228812	8.04944e+06	1.26739e+07	1.72661e+06	2.17029e+06		1.09212e+06	1.01476e+07
	S3-64.d	3.90614e+06	2.18457e+06		1.09451e+06	4.8385e+06		462436	435632	2.34678e+07	1.44628e+06	205698	6.79366e+06	1.15252e+07	1.57129e+06	2.02057e+06		976801	8.94323e+06
	S3-65.d	3.99102e+06	2.14728e+06		1.12145e+06	4.82898e+06		437741	438122	2.33291e+07	1.44658e+06	228605	6.93386e+06	1.10718e+07	1.52528e+06	1.93815e+06		969593	9.01754e+06
	S3-66.d	4.3361e+06	2.3085e+06		1.19106e+06	5.26061e+06		451399	468914	2.55102e+07	1.61795e+06	173242	7.80094e+06	1.17529e+07	1.65606e+06	2.04451e+06		1.12847e+06	9.26582e+06
	S3-67.d	4.16575e+06	2.23061e+06		1.15718e+06	5.01882e+06		427108	451758	2.43566e+07	1.51993e+06	228688	7.34727e+06	1.12083e+07	1.45801e+06	1.92094e+06		1.02566e+06	9.00539e+06
QC:
Batch	Samples	Alanine Results	Arginine Results	Asparagine Results	Aspartic acid Results	Glutamic Acid Results	Glutamine Results	Glycine Results	Histidine Results	Isoleu-leu Results	Lysine Results	Methionine Results	Phenylenine Results	Proline Results	Serine Results	Threonine Results	Tryptophan Results	Tyrosine Results	Valine Results
Batch 1	QC-1.d	339609	84798.3	4787.5	8911.28	213009	83830.1	37710.2	8614.76	3.45175e+06	83594.8	48758.9	942722	1.14918e+06	60247.9	83614.8	57076.6	97871.5	920356
	QC-2.d	338054	84501.2	5052.37	8710.23	207014	83224	36574.5	8595.1	3.50803e+06	83060.5	50689.3	970032	1.12669e+06	59953.9	83507.4	57973.5	103116	930550
	QC-3.d	337532	87700.5	4993.5	8570.51	205470	82373.7	36336.9	9258.83	3.46828e+06	82221.1	51514.4	966670	1.09765e+06	60345.9	83911.5	58211.1	101393	974961
	QC-4.d	332448	87734.5	4546.66	8699.06	201795	80208.9	36184	9360.23	3.49326e+06	80170.5	49109.2	1.00172e+06	1.07903e+06	58939.5	80337.8	59770.3	106909	910334
Batch 2	QC-1.d	398043	94661.3	5724.48	10793.1	243710	98548.2	41757.4	10926.8	4.11623e+06	98148.9	61911.7	1.17897e+06	1.45685e+06	69598.9	99080.9	73521.4	125112	975536
	QC-2.d	413006	100359	6016.33	11115.7	258692	103405	43459.5	10886.9	3.92795e+06	103335	61927.8	987810	1.55048e+06	72009.1	104450	54517.4	99774.5	939077
	QC-3.d	405378	97605.7	5817.64	10677.9	248504	98386	43970.1	10630.3	4.13493e+06	98273.2	62023.8	1.15007e+06	1.46477e+06	68911.5	99601.8	65928.2	117165	911934
	QC-4.d	401730	96142	5343.07	10022.9	248653	98106.4	41650.5	10451.5	4.11134e+06	98220.1	61365.6	1.16804e+06	1.44641e+06	70229.8	98002.6	72319	121795	937413
Batch 3	QC-1.d	389220	95571	5558.9	10373.6	238813	92667.1	41725.1	10559.5	3.54312e+06	95390.3	55026	918185	1.40278e+06	66739.7	95481.7	48811.2	96575.4	894567
	QC-2.d	387569	91537.4	5366.52	10034	237919	93650	40368	10022	4.0003e+06	93261.4	59709.8	1.11236e+06	1.36569e+06	66762.9	94348.6	68891.6	124916	944971
	QC-3.d	366836	90104.8	5482.35	9525.72	223744	91345.5	40510.6	9582.35	3.79221e+06	91144	57087.5	1.04975e+06	1.32148e+06	63568.9	89281.1	61144.9	111653	943641
	QC-4.d	365031	89504.5	5544.06	9159.75	218019	86422.1	38451.3	9670.11	3.81162e+06	86294.6	54784.9	1.08981e+06	1.27503e+06	61344.2	86151	67301.9	119335	902225
Protein Concentration (g/L):
1.d	45.339
3.d	57.9929
4.d	57.4662
5.d	67.5509
6.d	40.0009
7.d	53.4464
9.d	58.672
10.d	63.566
11.d	46.3363
12.d	58.5964
13-2.d	63.1794
14-2.d	53.9632
15.d	49.3553
17.d	58.1436
18.d	53.3726
19.d	55.4468
20.d	53.2252
22.d	45.1969
23.d	56.2672
24.d	57.2409
25.d	54.1111
26.d	51.1722
27.d	47.4098
28.d	59.8088
29.d	51.83
31.d	44.0633
32.d	47.2663
33.d	50.1529
35.d	51.9764
36.d	43.4986
37.d	53.0043
38.d	52.0497
39.d	52.0497
41.d	43.4281
42.d	44.0633
43.d	31.7496
44.d	52.5632
49.d	46.1935
50.d	49.79
51.d	54.7037
52.d	50.4436
53.d	47.9844
54.d	53.8154
55.d	56.4167
56.d	50.6619
57.d	45.1969
58.d	48.9215
59.d	52.5632
60.d	52.1963
61.d	52.4898
62.d	48.5606
63.d	58.0682
64.d	46.3363
65.d	49.79
66.d	61.0282
67.d	47.6251
