# Supplementary material for: Metabolomics method to comprehensively analyze amino acids in different domains
Source: Royal Society of Chemistry journal article supplement (doi:10.1039/c4an02386b), 2015-01-01
Supplement: c4an02386b2.pdf [file c4an02386b2.pdf]

## Supplementary Information

### Metabolomics Method to Comprehensively Analyze Amino Acids in Different Domains

Haiwei Gu<sup>1,2\*</sup>, Jianhai Du<sup>3</sup>, Fausto Carnevale Neto<sup>1,4</sup>, Patrick Andrew Carroll<sup>5</sup>, Sally Turner<sup>3</sup>, E. Gabriela Chiorean<sup>6,7</sup>, Robert N. Eisenman<sup>5</sup>, and Daniel Raftery<sup>1,8\*</sup>

<sup>1</sup> Northwest Metabolomics Research Center, Department of Anesthesiology and Pain Medicine, University of Washington, 850 Republican St., Seattle, WA 98109, USA

<sup>2</sup> Jiangxi Key Laboratory for Mass Spectrometry and Instrumentation, East China Institute of Technology, 418 Guanglan Ave., Nanchang, Jiangxi Province 330013, China

<sup>3</sup> Department of Biochemistry, University of Washington, 750 Republican St., Seattle, WA 98109, USA

<sup>4</sup> Department of Organic Chemistry, Institute of Chemistry, Sao Paulo State University, Rua Francisco Degni 55, Araraquara, Sao Paulo 14800-900, Brazil

<sup>5</sup> Division of Basic Sciences, Fred Hutchinson Cancer Research Center, MS A2-025, P.O. Box 19024, Seattle, WA, 98109, USA

<sup>6</sup> Department of Medicine, University of Washington, 825 Eastlake Ave East, Seattle, WA 98109, USA

<sup>7</sup> Indiana University Melvin and Bren Simon Cancer Center, 535 Barnhill Dr, Indianapolis, IN, 46202, USA

<sup>8</sup> Public Health Sciences Division, Fred Hutchinson Cancer Research Center, 1100 Fairview Ave. N., Seattle, WA 98109, USA

\* Corresponding Authors:

Haiwei Gu, PhD  
Department of Anesthesiology and Pain Medicine  
University of Washington  
850 Republican St.  
Seattle, WA 98109  
Tel: 206-685-4753  
Fax: 206-616-4819  
Email: [haiwei@uw.edu](mailto:haiwei@uw.edu)

Professor Daniel Raftery, PhD  
Department of Anesthesiology and Pain Medicine  
University of Washington  
850 Republican St.  
Seattle, WA 98109  
Tel: 206-543-9709  
Fax: 206-616-4819  
Email: [draftery@uw.edu](mailto:draftery@uw.edu)

39

**Table S1.** The optimized MS parameters to measure amino acids in this study.

| Amino Acid                      | Precursor Ion | Product Ion | CE | Fragmentor | Accelerator voltage |
|---------------------------------|---------------|-------------|----|------------|---------------------|
| isoleucine/leucine <sup>a</sup> | 132.1         | 86.1        | 10 | 80         | 1                   |
| valine                          | 118.2         | 72.2        | 10 | 80         | 1                   |
| glutamine <sup>b</sup>          | 147.1         | 83.8        | 20 | 80         | 1                   |
| glutamic acid                   | 148.0         | 84.2        | 15 | 80         | 1                   |
| tryptophan                      | 205.1         | 118.0       | 25 | 80         | 5                   |
| proline                         | 116.1         | 70.2        | 15 | 80         | 1                   |
| threonine                       | 120.1         | 74.2        | 10 | 80         | 1                   |
| histidine                       | 156.1         | 110.0       | 10 | 80         | 5                   |
| alanine                         | 90.1          | 43.9        | 10 | 60         | 1                   |
| serine                          | 105.9         | 60.1        | 10 | 60         | 1                   |
| aspartic acid                   | 133.9         | 74.0        | 15 | 80         | 1                   |
| tyrosine                        | 182.1         | 136.1       | 10 | 80         | 3                   |
| methionine                      | 150.0         | 104.1       | 10 | 80         | 1                   |
| cysteine <sup>c</sup>           | 121.8         | 75.9        | 15 | 140        | 1                   |
| lysine <sup>b</sup>             | 147.0         | 84.1        | 15 | 80         | 7                   |
| phenylalanine                   | 166.1         | 120.1       | 10 | 80         | 5                   |
| arginine                        | 175.1         | 70.2        | 25 | 80         | 1                   |
| asparagine                      | 132.9         | 74.0        | 15 | 80         | 1                   |
| glycine                         | 76.2          | 29.9        | 10 | 60         | 1                   |

40

41 <sup>a</sup>Isoleucine and leucine have the same optimized MS parameters.42 <sup>b</sup>Glutamine and lysine have different but very similar optimized MS parameters. In this study,

43 they were measured separately, but they were combined for data analysis.

44 <sup>c</sup>We could not obtain a good sensitivity or peak shape for cysteine; therefore, it was excluded

45 from analysis in this study.

46

47

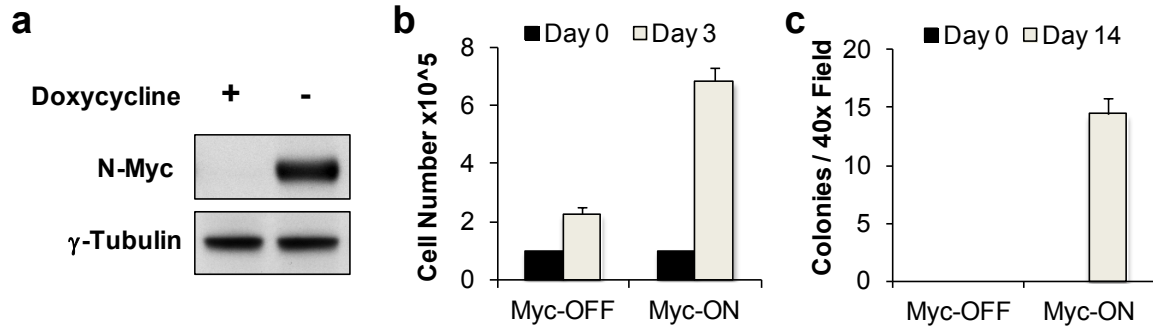

48

49 **Fig. S1.** The characterization of Myc-On and Myc-Off cells. a) Western blot showing that  
 50 Tet21N cells can express a doxycycline-repressible *N-Myc* construct which allows for inducible  
 51 *N-Myc* expression in the presence/absence of doxycycline (Myc-Off/Myc-On), b) ectopic *N-Myc*  
 52 induces hyperproliferation, and c) *N-Myc* induces anchorage-independent growth in soft agar,  
 53 an indicator of malignant transformation.

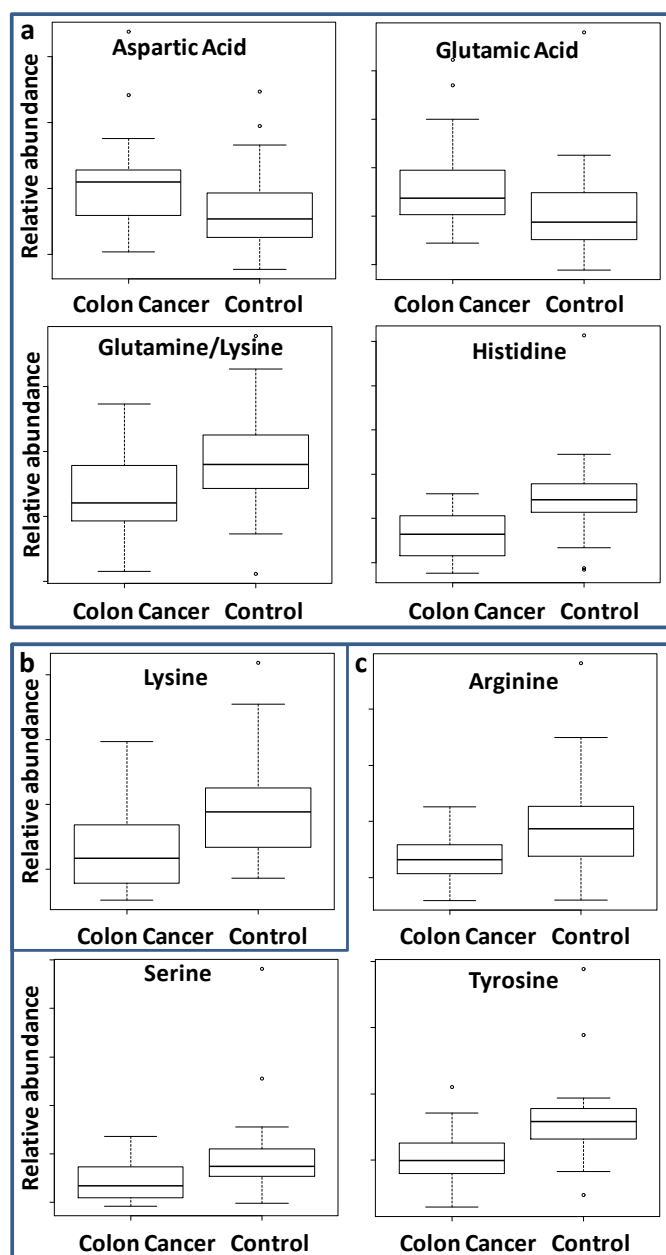

**Fig. S2.** Box-and-whisker plots for the amino acid markers in constructing the model in Fig. 5d.:  
a) aspartic acid, glutamic acid, glutamine/lysine, and histidine from FAAs, b) lysine from  
FSPAAs, and c) arginine, serine, and tyrosine from IPAAAs.

60 **Separate Excel File:** The integrated areas and BCA values for cell and serum samples.
